# Supplementary material for: What is the best combination treatment with transarterial chemoembolization of unresectable hepatocellular carcinoma? a systematic review and network meta-analysis
Source: PubMed Central journal article supplement (PMC5725039; doi:10.18632/oncotarget.20119), 2017-08-10
Supplement: oncotarget-08-100508-s001.pdf [file oncotarget-08-100508-s001.pdf]

# What is the best combination treatment with transarterial chemoembolization of unresectable hepatocellular carcinoma? a systematic review and network meta-analysis

## SUPPLEMENTARY MATERIALS

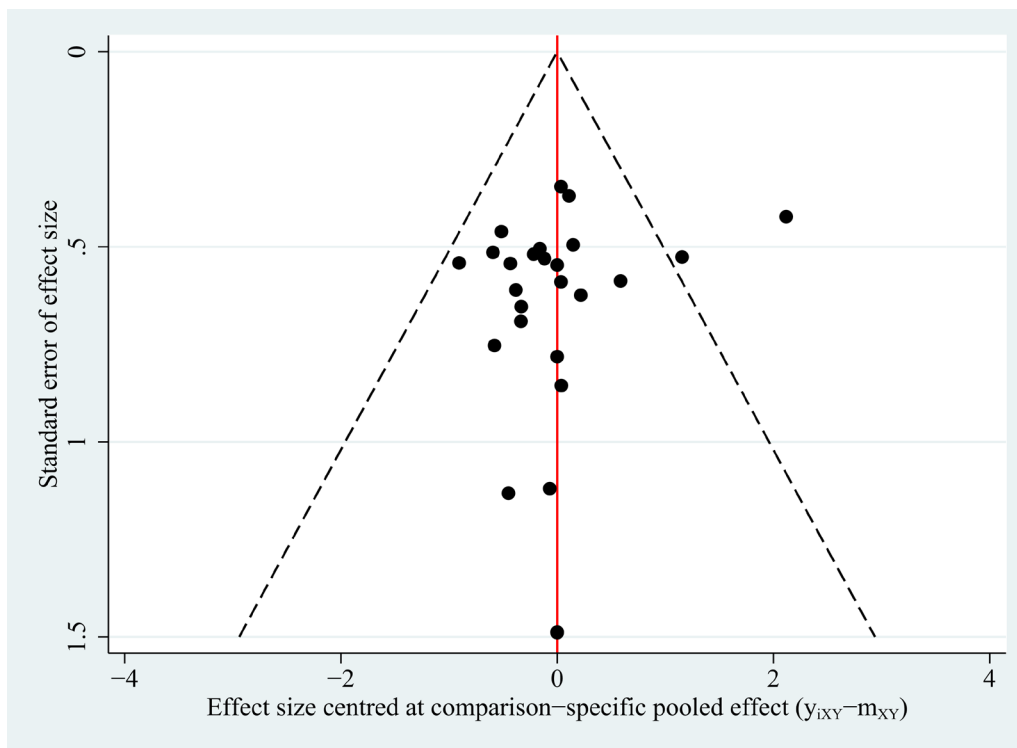

Supplementary Figure 1: Network funnel plots of music on treatment response.

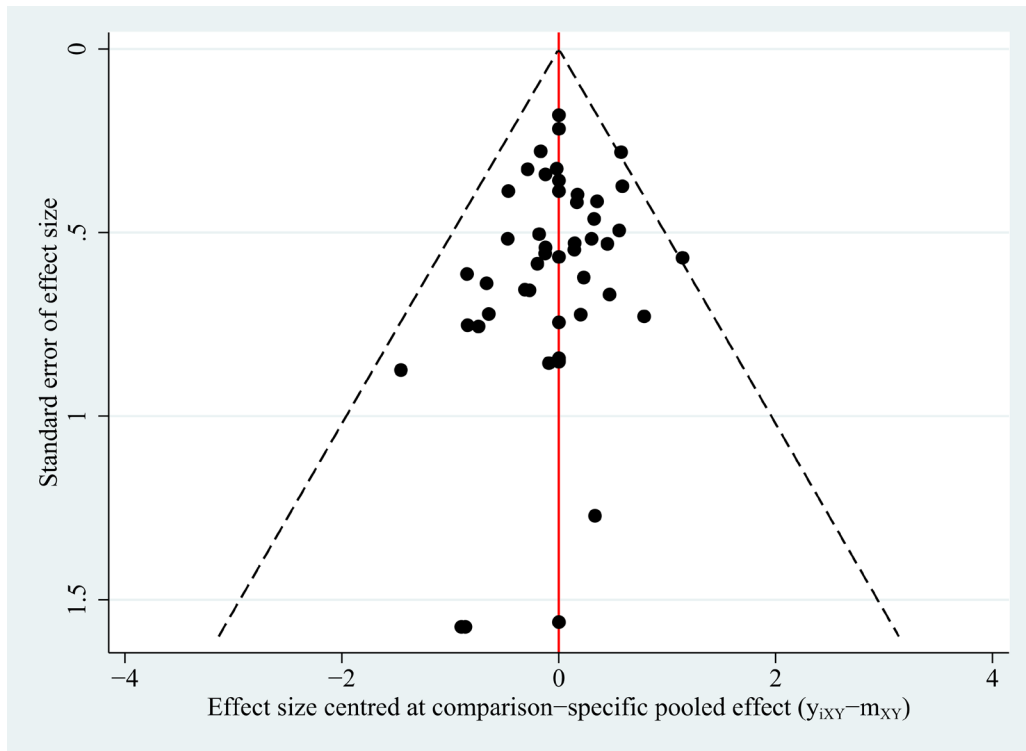

**Supplementary Figure 2: Network funnel plots of music on 1-year overall survival rate.**

**Supplementary Table 1: Study Characteristics.** See [Supplementary\\_Table\\_1](#)

**Supplementary Table 2: Risk of Bias Assessments.** See [Supplementary\\_Table\\_2](#)

### Supplementary Table 3: Search strategies for pubmed, EMBASE and the cochrane library database

#### Search strategies for PubMed

#1.(Transarterial[All Fields] AND chemoembolization[All Fields] AND unresectable[All Fields] AND ("carcinoma, hepatocellular"[MeSH Terms] OR ("carcinoma"[All Fields] AND "hepatocellular"[All Fields]) OR "hepatocellular carcinoma"[All Fields] OR ("hepatocellular"[All Fields] AND "carcinoma"[All Fields]))) AND Clinical Trial[ptyp]

#2. (Transarterial[All Fields] AND chemoembolization[All Fields] AND unresectable[All Fields] AND ("carcinoma, hepatocellular"[MeSH Terms] OR ("carcinoma"[All Fields] AND "hepatocellular"[All Fields]) OR "hepatocellular carcinoma"[All Fields] OR ("hepatocellular"[All Fields] AND "carcinoma"[All Fields]))) AND Randomized Controlled Trial[ptyp]

#3. (Transarterial[All Fields] AND chemoembolization[All Fields] AND unresectable[All Fields] AND HCC[All Fields]) AND (Randomized Controlled Trial[ptyp] OR Clinical Trial[ptyp])

#4.(TACE[All Fields] AND unresectable[All Fields] AND ("carcinoma, hepatocellular"[MeSH Terms] OR ("carcinoma"[All Fields] AND "hepatocellular"[All Fields]) OR "hepatocellular carcinoma"[All Fields] OR ("hepatocellular"[All Fields] AND "carcinoma"[All Fields]))) AND (Randomized Controlled Trial[ptyp] OR Clinical Trial[ptyp])

#### Search strategies for EMBase

#1transarterial AND ('chemoembolization'/exp OR chemoembolization) AND unresectable AND hepatocellular AND ('carcinoma'/exp OR carcinoma)

#2 tace AND unresectable AND hepatocellular AND carcinoma

#3 transarterial AND chemoembolization AND unresectable AND hcc

#### Search strategies for Cochrane library

#1.unresectable hepatocellular carcinoma, Transarterial chemoembolization

#2. MeSH descriptor

### Supplementary Table 4: Assessment of the quality of evidence using the grading of recommendations assessment

| Number of analyses, by outcome | Quality assessment |                      |                      |             |                     | Overall quality of evidence       |
|--------------------------------|--------------------|----------------------|----------------------|-------------|---------------------|-----------------------------------|
|                                | Risk of bias       | Inconsistency        | Indirectness         | Imprecision | Other consideration |                                   |
| <b>6-month OS</b>              | Serious*           | Serious <sup>†</sup> | Serious <sup>‡</sup> | Not serious | None                | +— <b>Very Low</b> <sup>*†‡</sup> |
| <b>1-year OS</b>               | Serious*           | Serious <sup>†</sup> | Serious <sup>‡</sup> | Not serious | None                | +— <b>Very Low</b> <sup>*†‡</sup> |
| <b>2-year OS</b>               | Serious*           | Serious <sup>†</sup> | Serious <sup>‡</sup> | Not serious | None                | +— <b>Very Low</b> <sup>*†‡</sup> |
| <b>3-year OS</b>               | Serious*           | Serious <sup>†</sup> | Serious <sup>‡</sup> | Not serious | None                | +— <b>Very Low</b> <sup>*†‡</sup> |
| <b>1-year DFS</b>              | Serious*           | Serious <sup>†</sup> | Serious <sup>‡</sup> | Not serious | None                | +— <b>Very Low</b> <sup>*†‡</sup> |
| <b>2-year DFS</b>              | Serious*           | Serious <sup>†</sup> | Serious <sup>‡</sup> | Not serious | None                | +— <b>Very Low</b> <sup>*†‡</sup> |

\*Not all studies are randomized controlled trials. <sup>†</sup>Substantial heterogeneity. <sup>‡</sup>Network meta-analysis.
